# Supplementary material for: Evolution of acoustic communication in fungus-growing ant societies
Source: Research Square preprint supplement (doi:10.21203/rs.3.rs-948296/v2), 2021-10-08
Supplement: Supplementary file 1 [file 1aa973dd0097444b18bb6a54.docx]

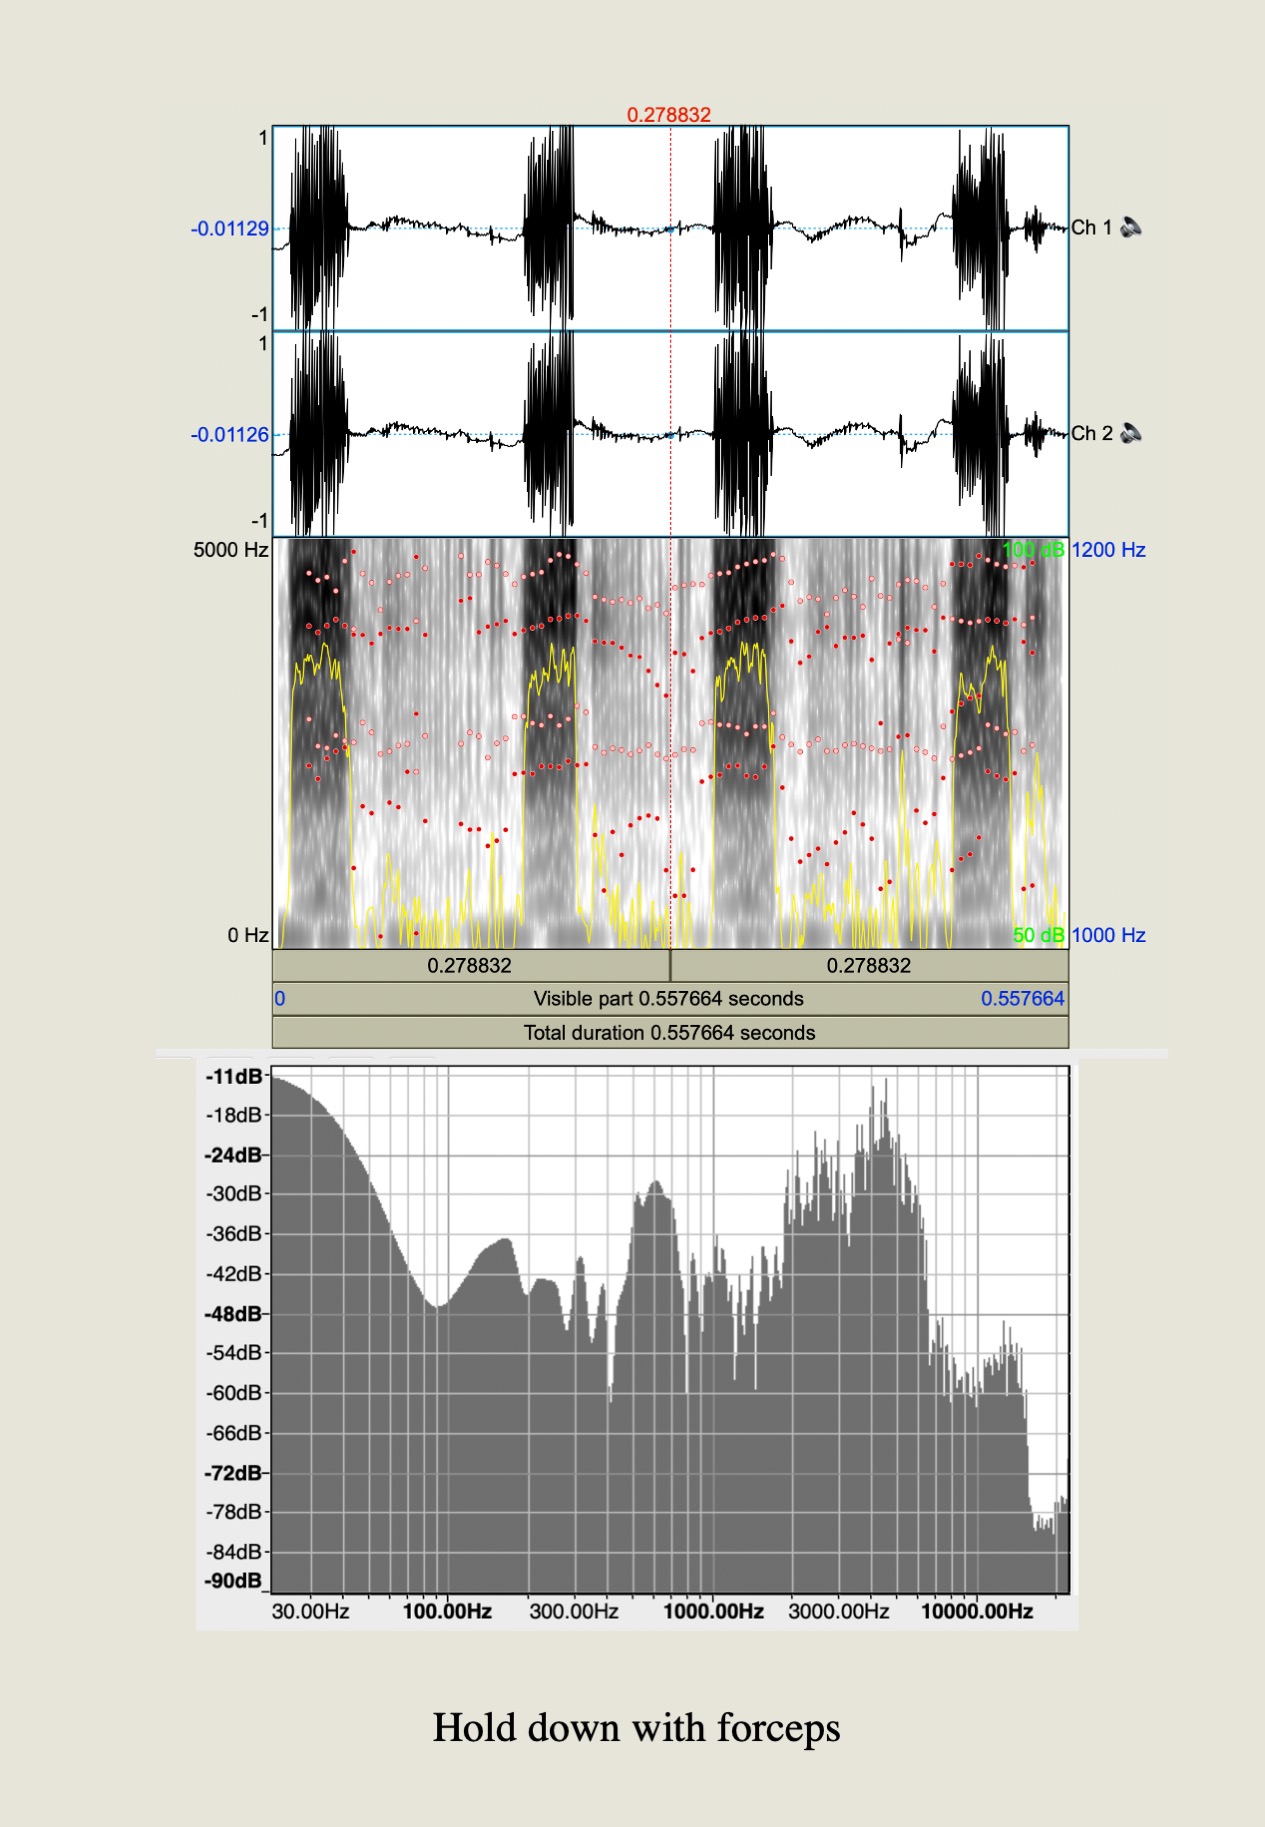


a


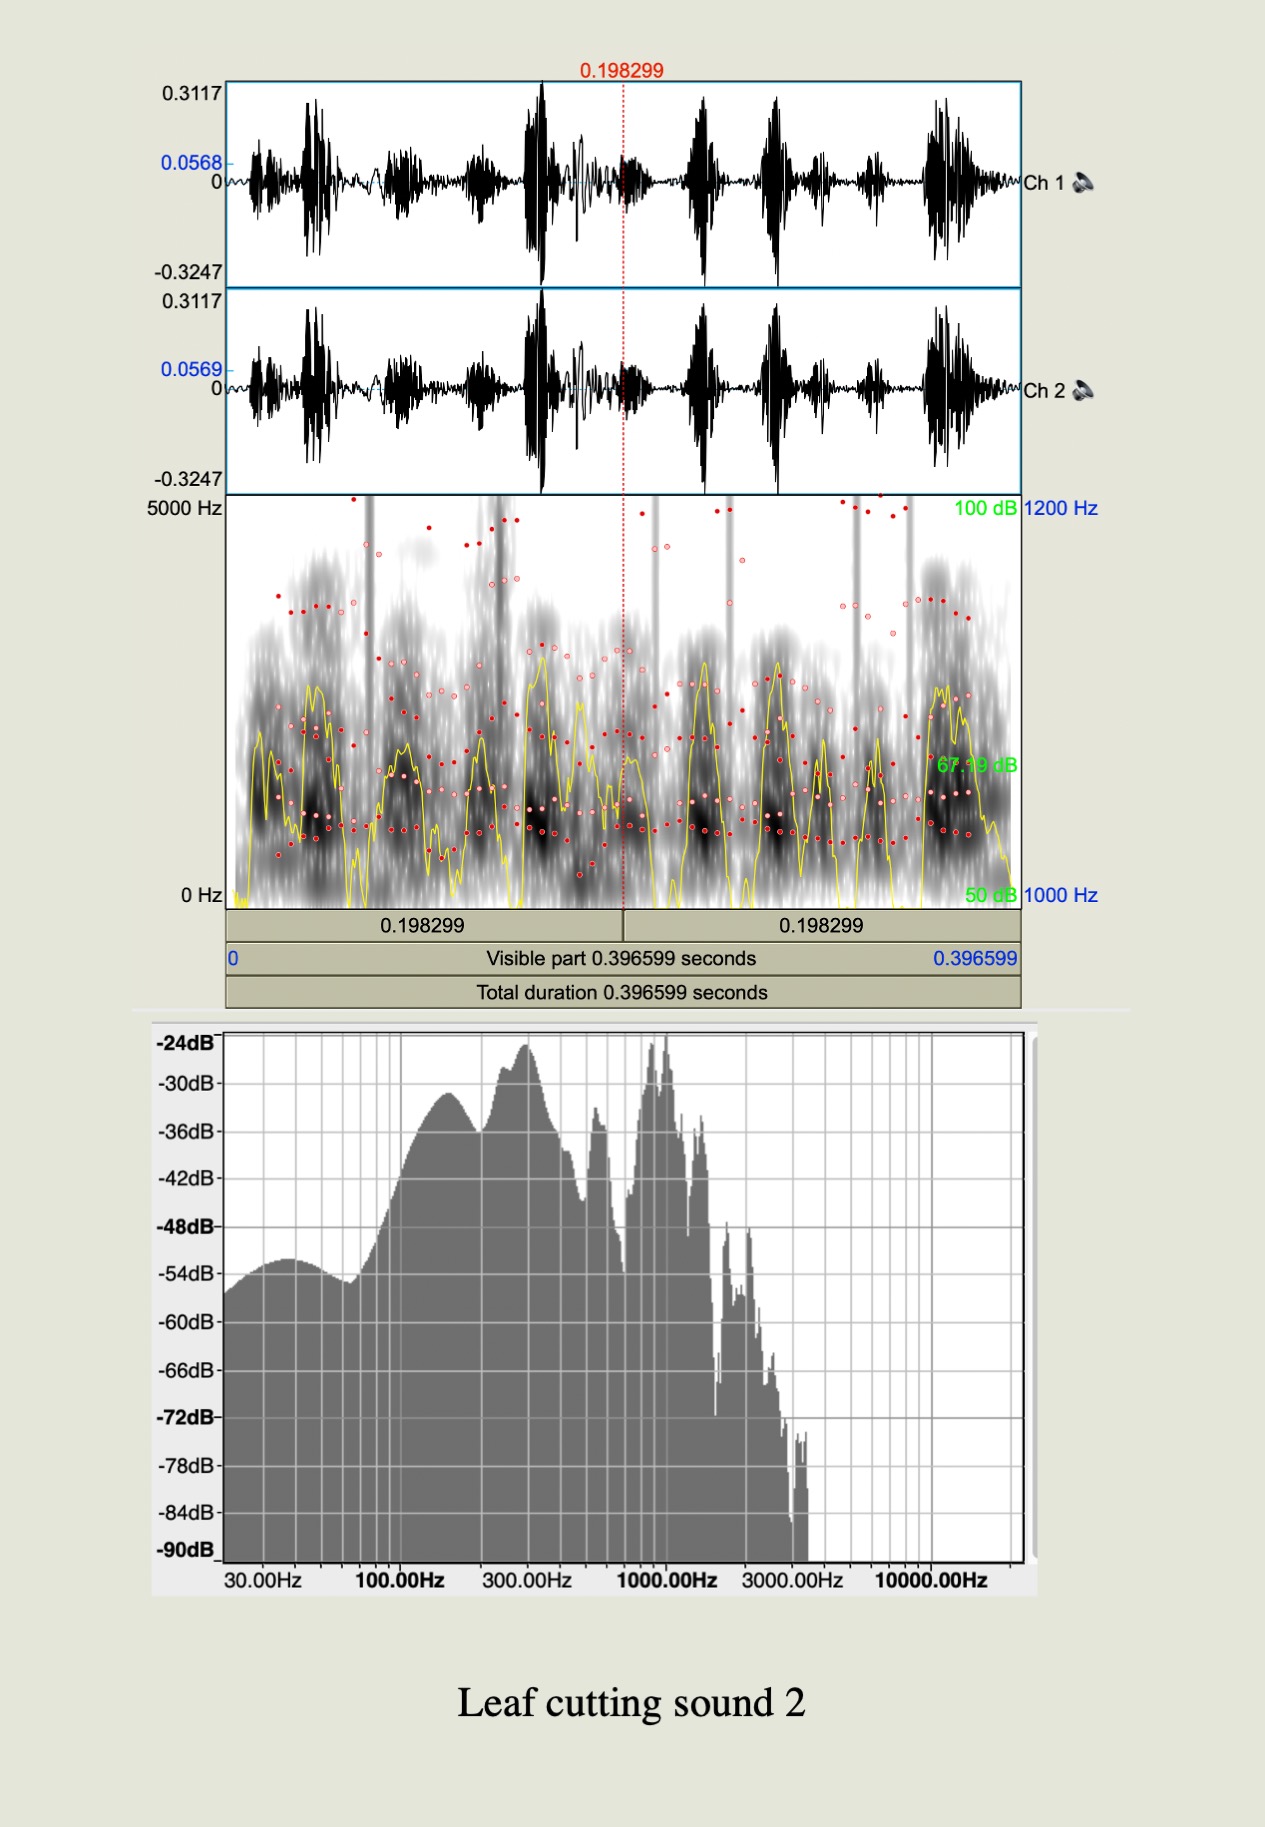

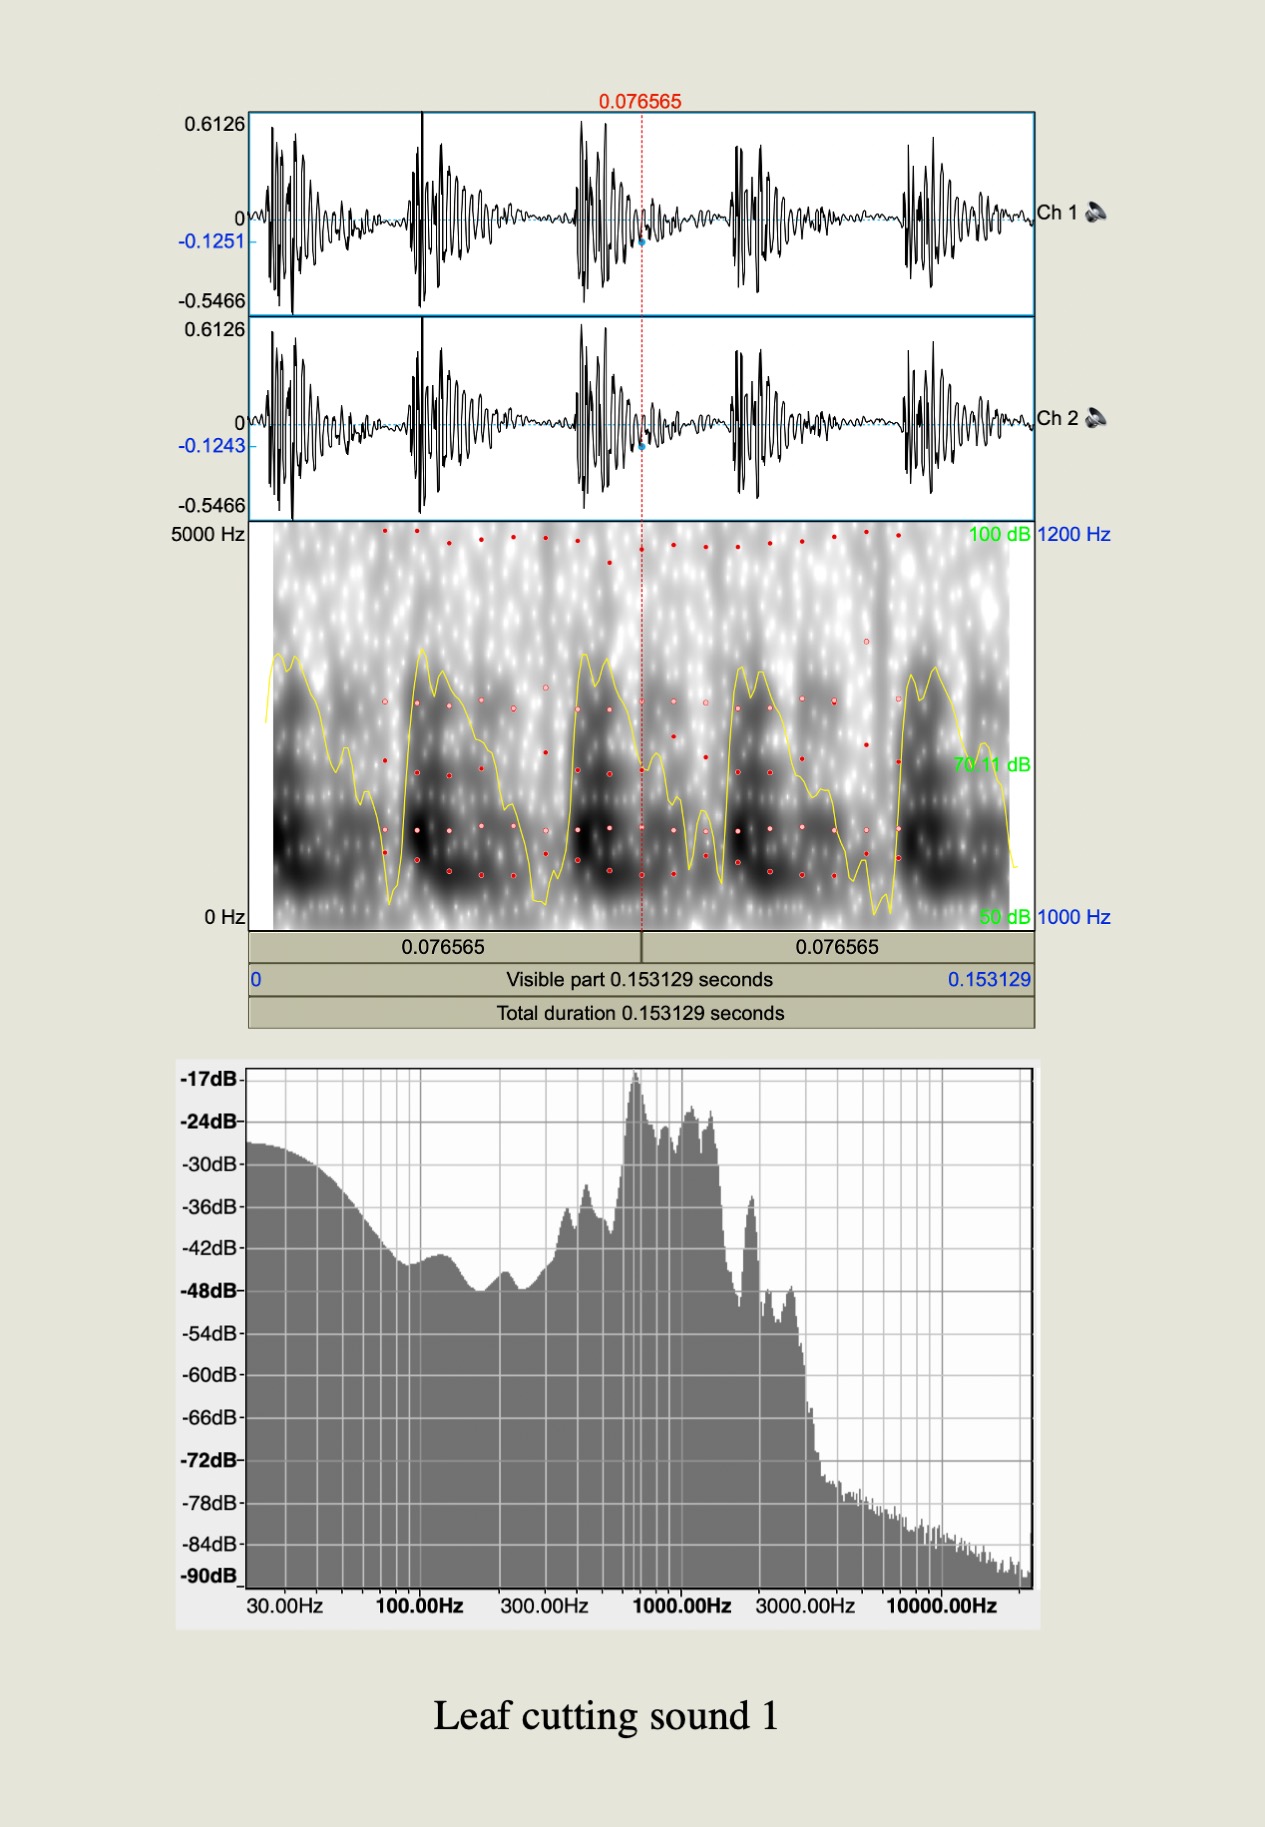

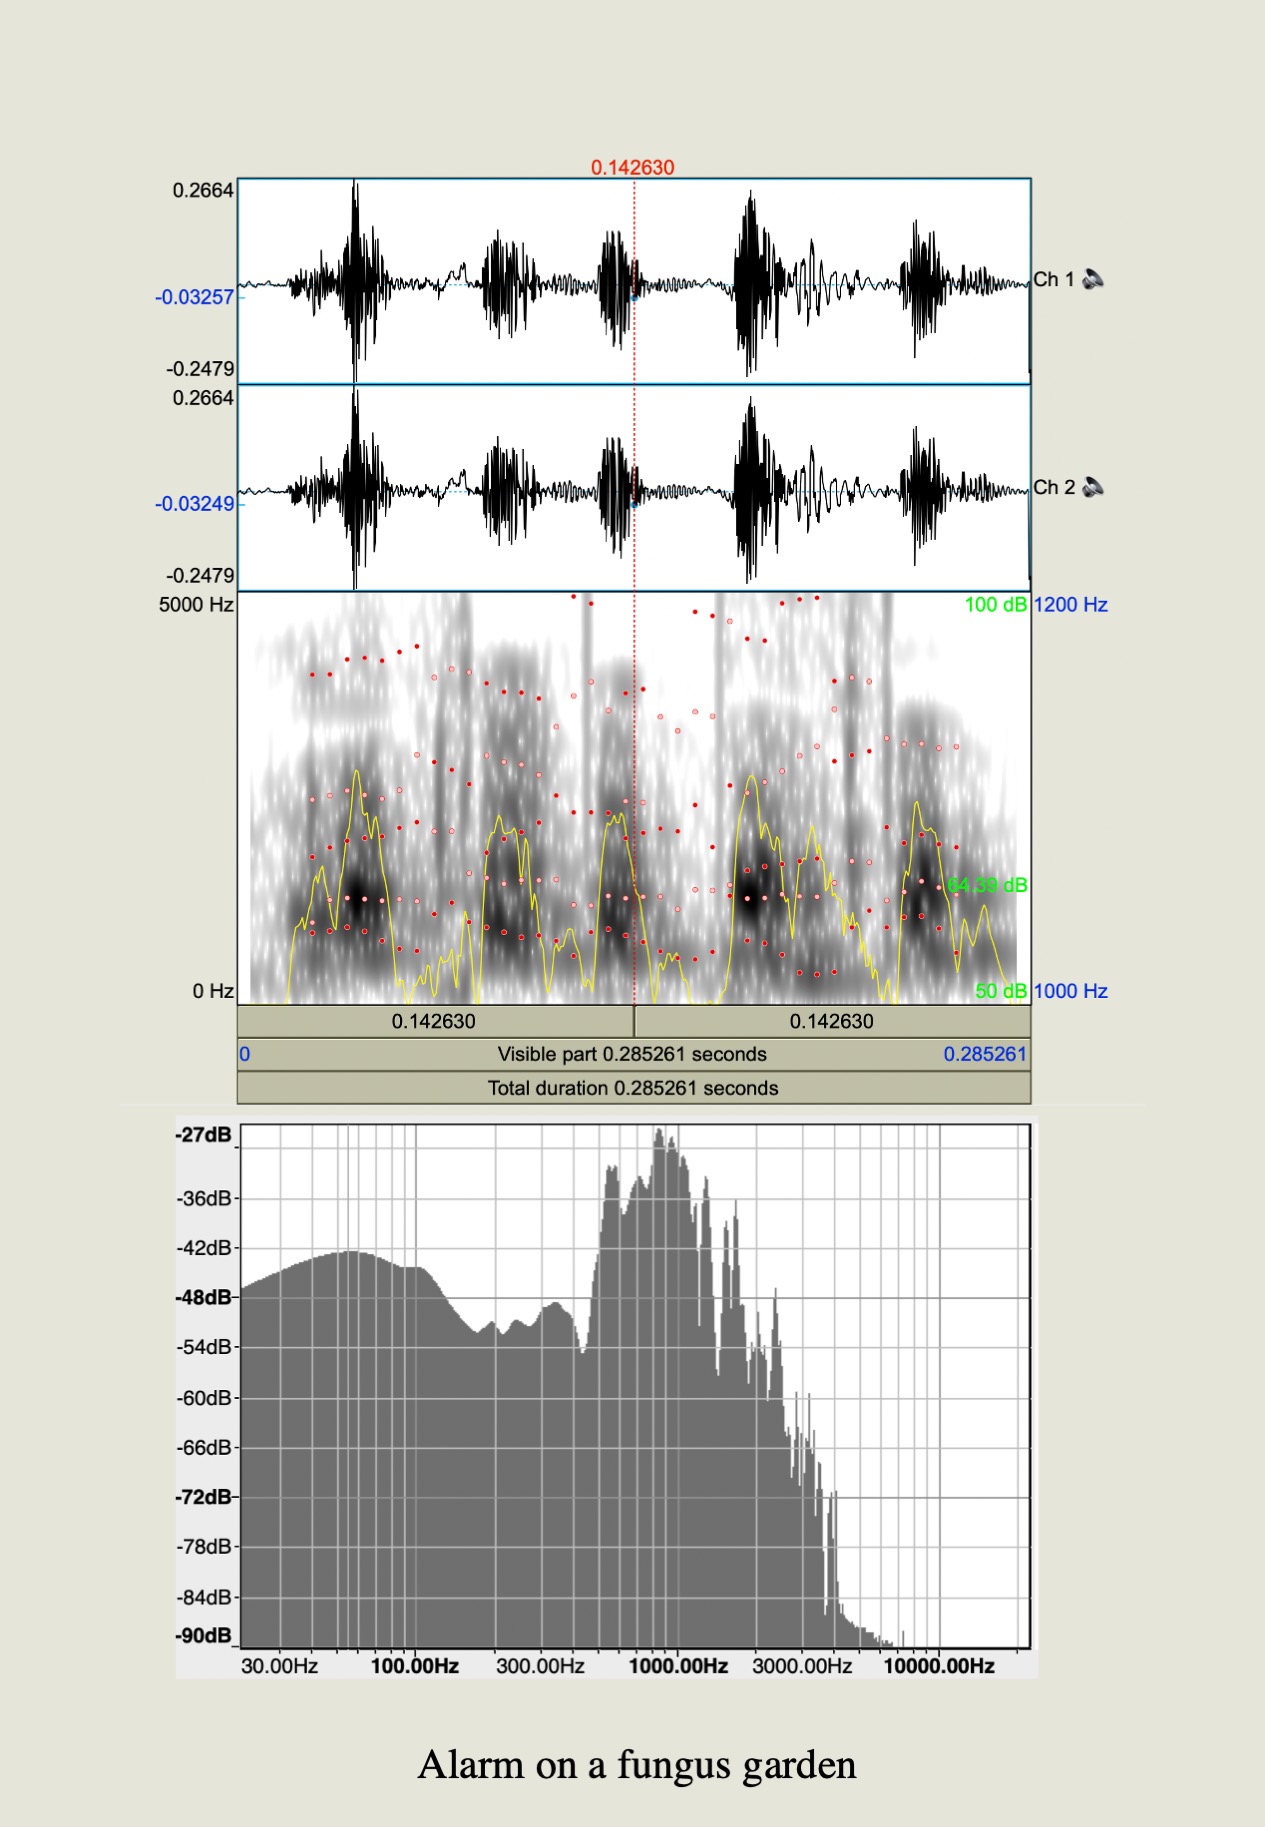

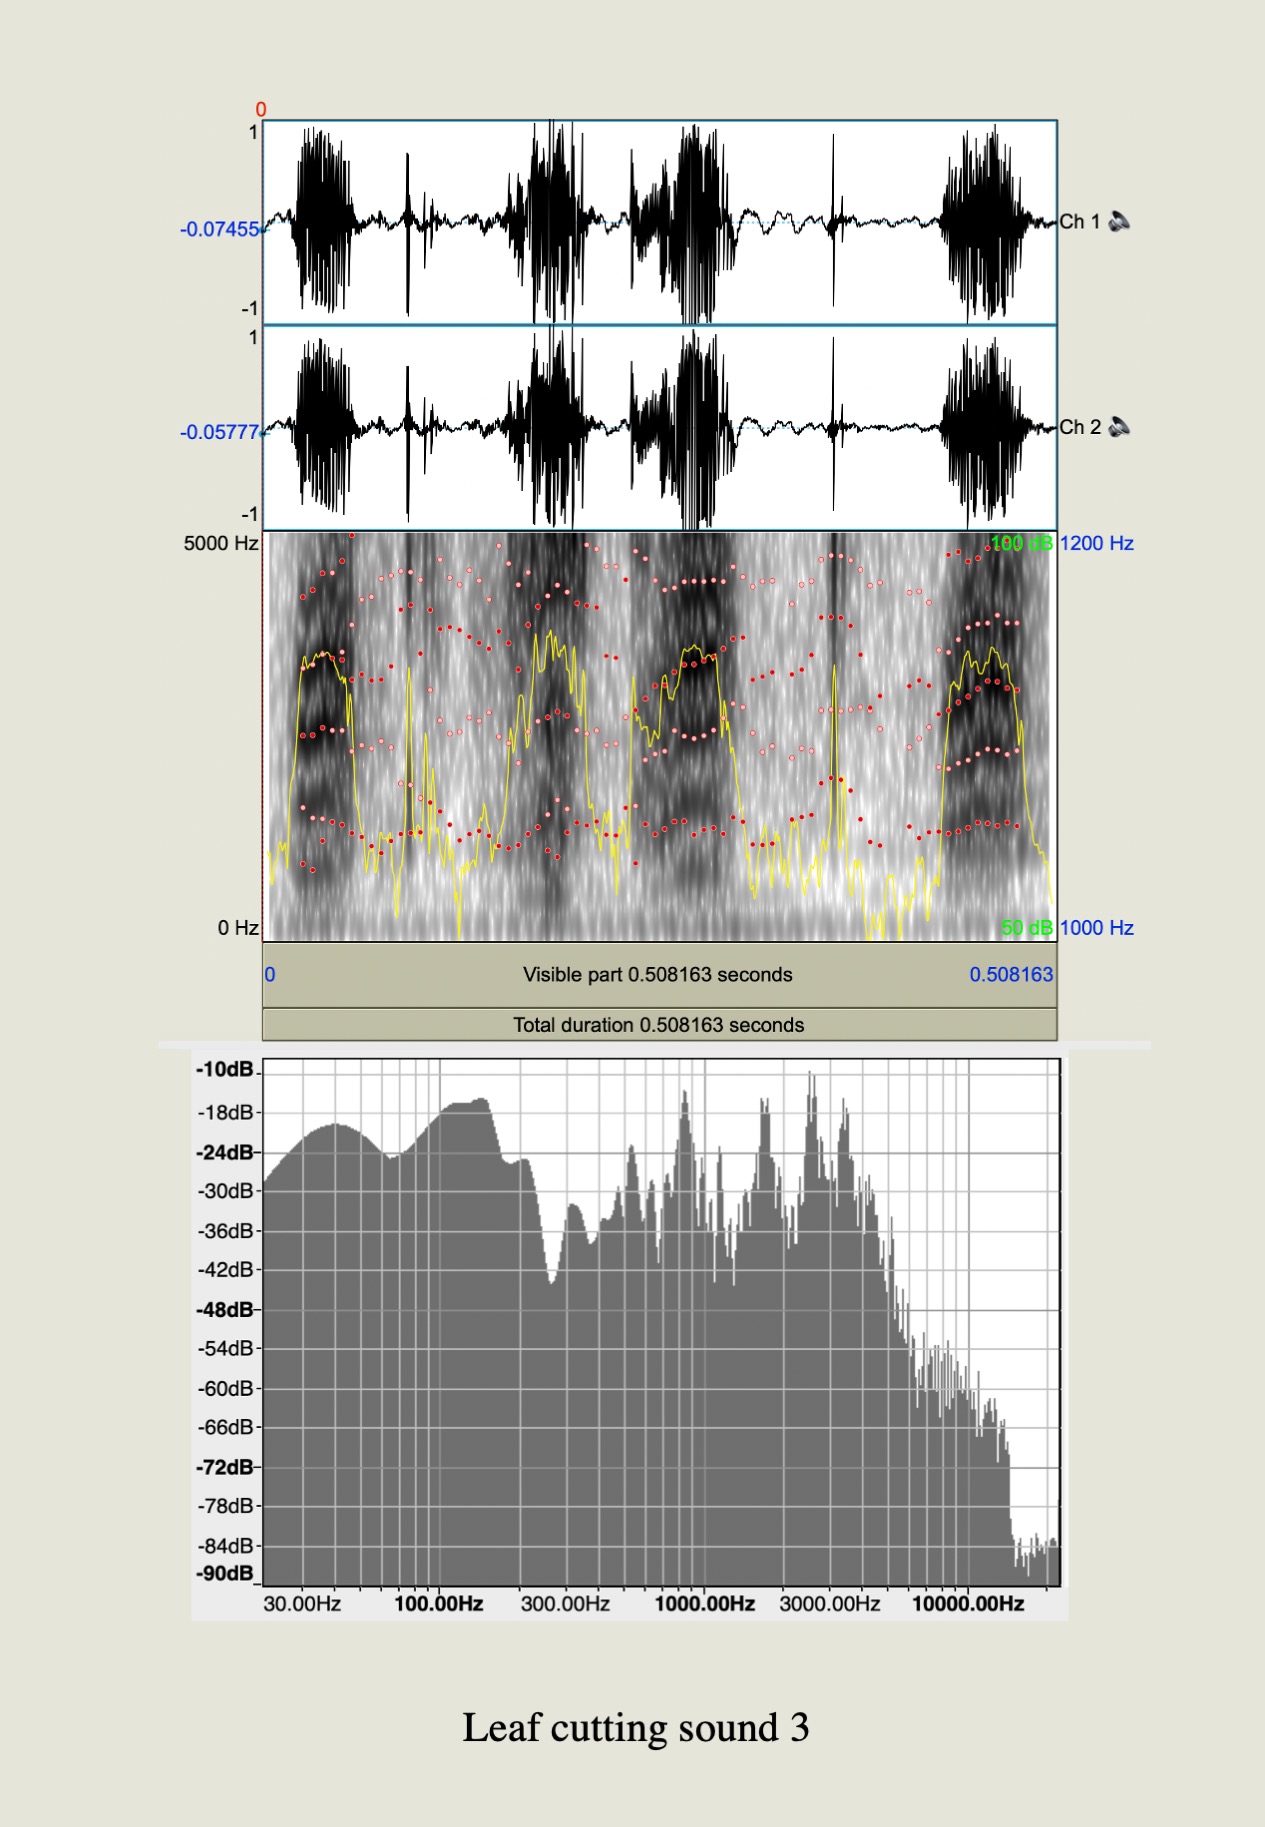

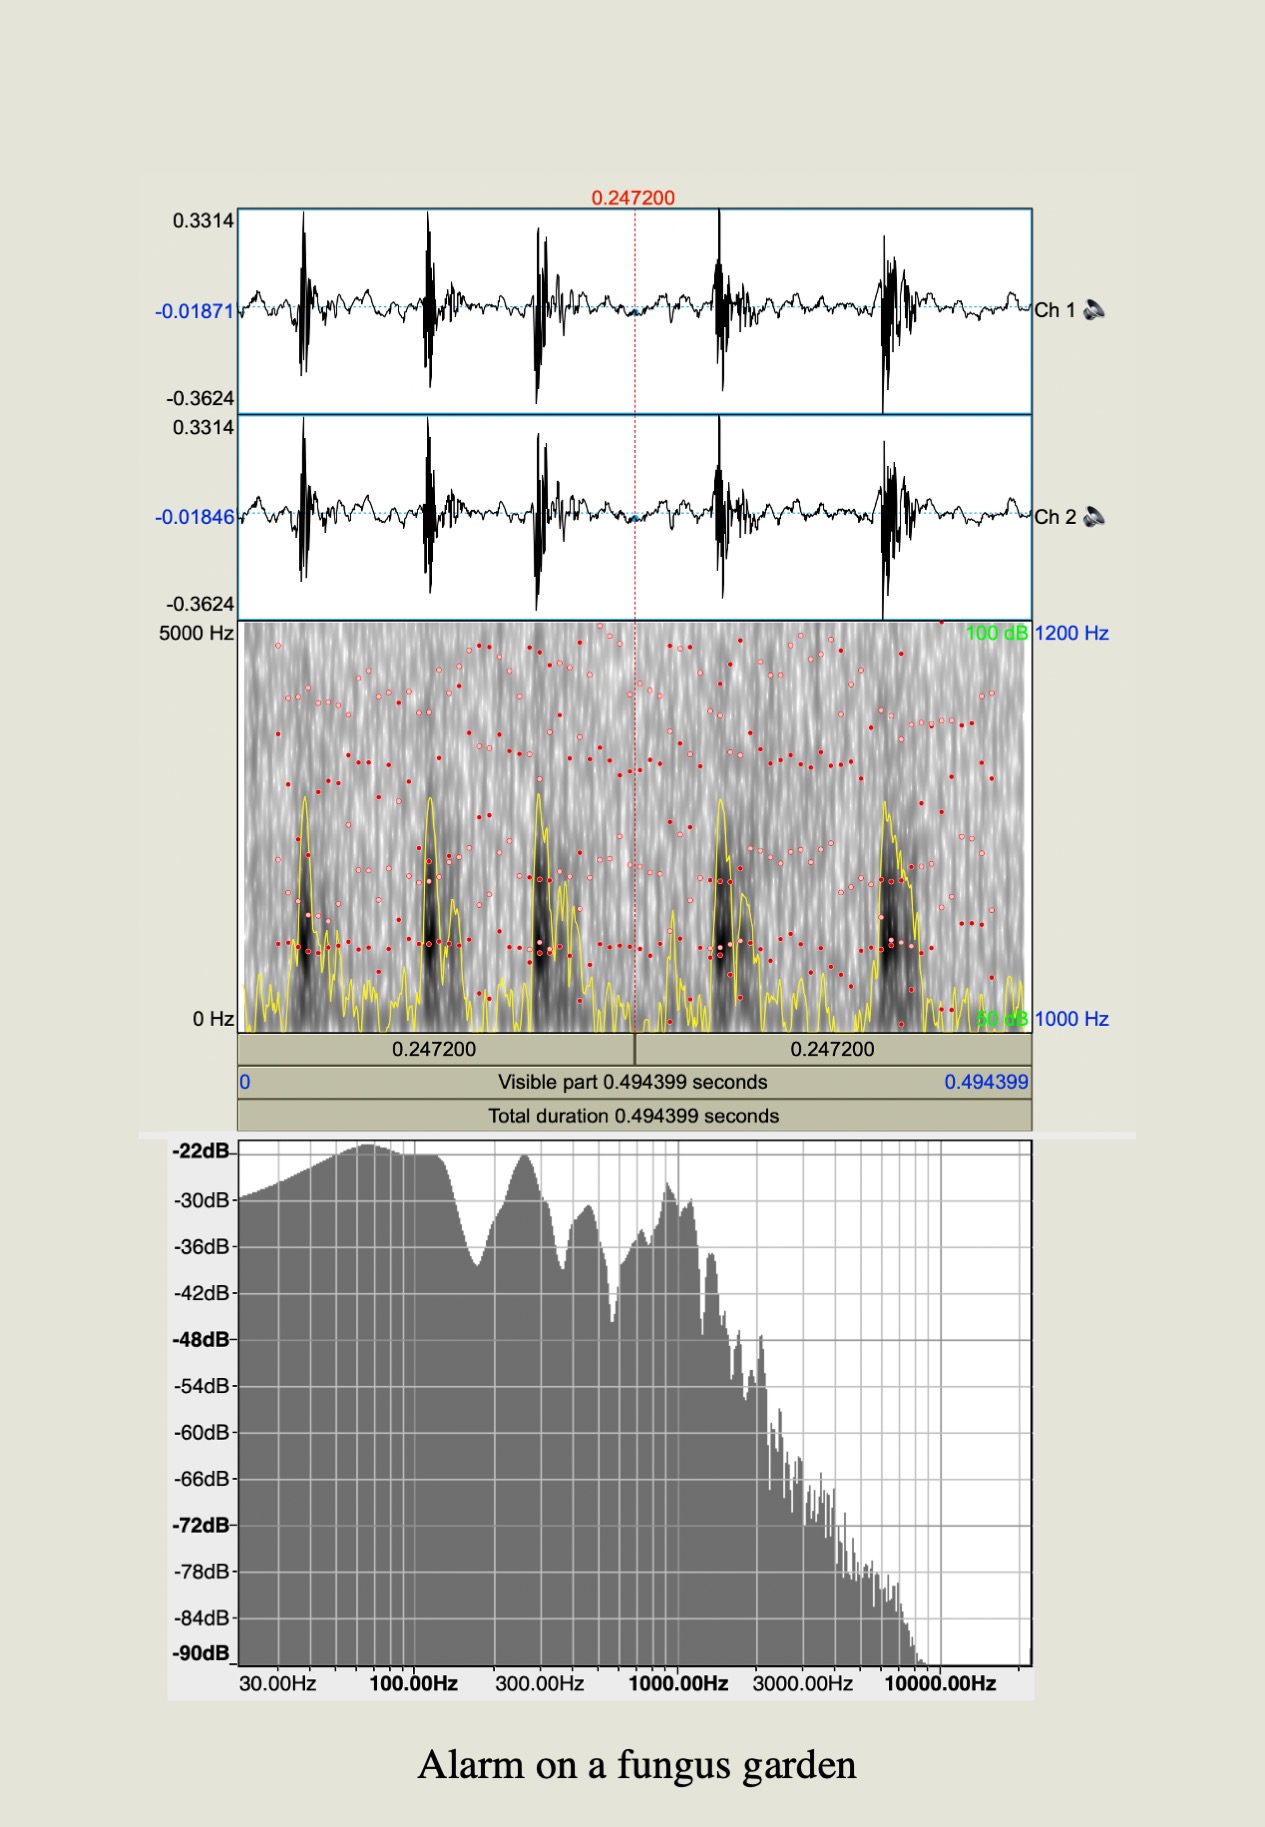

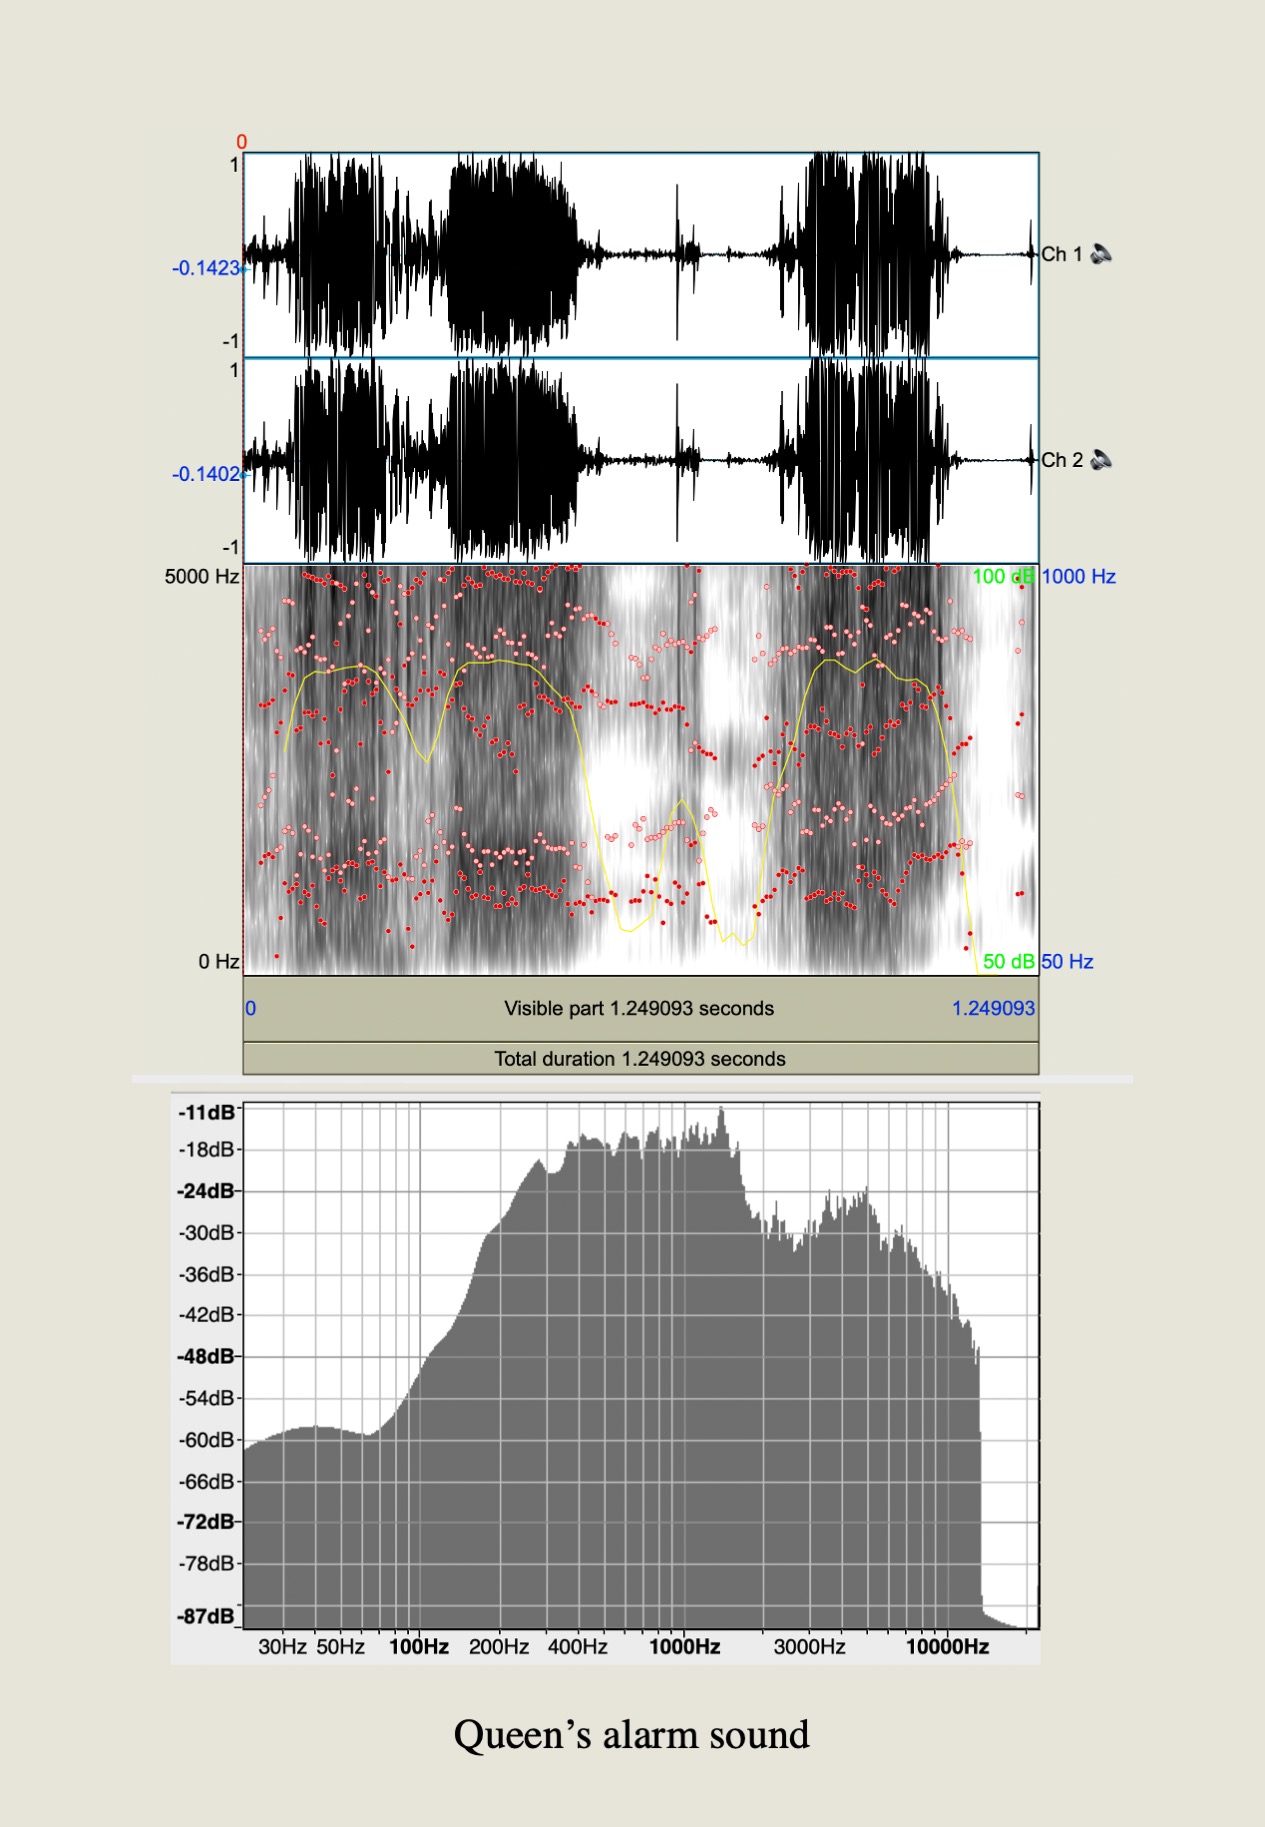

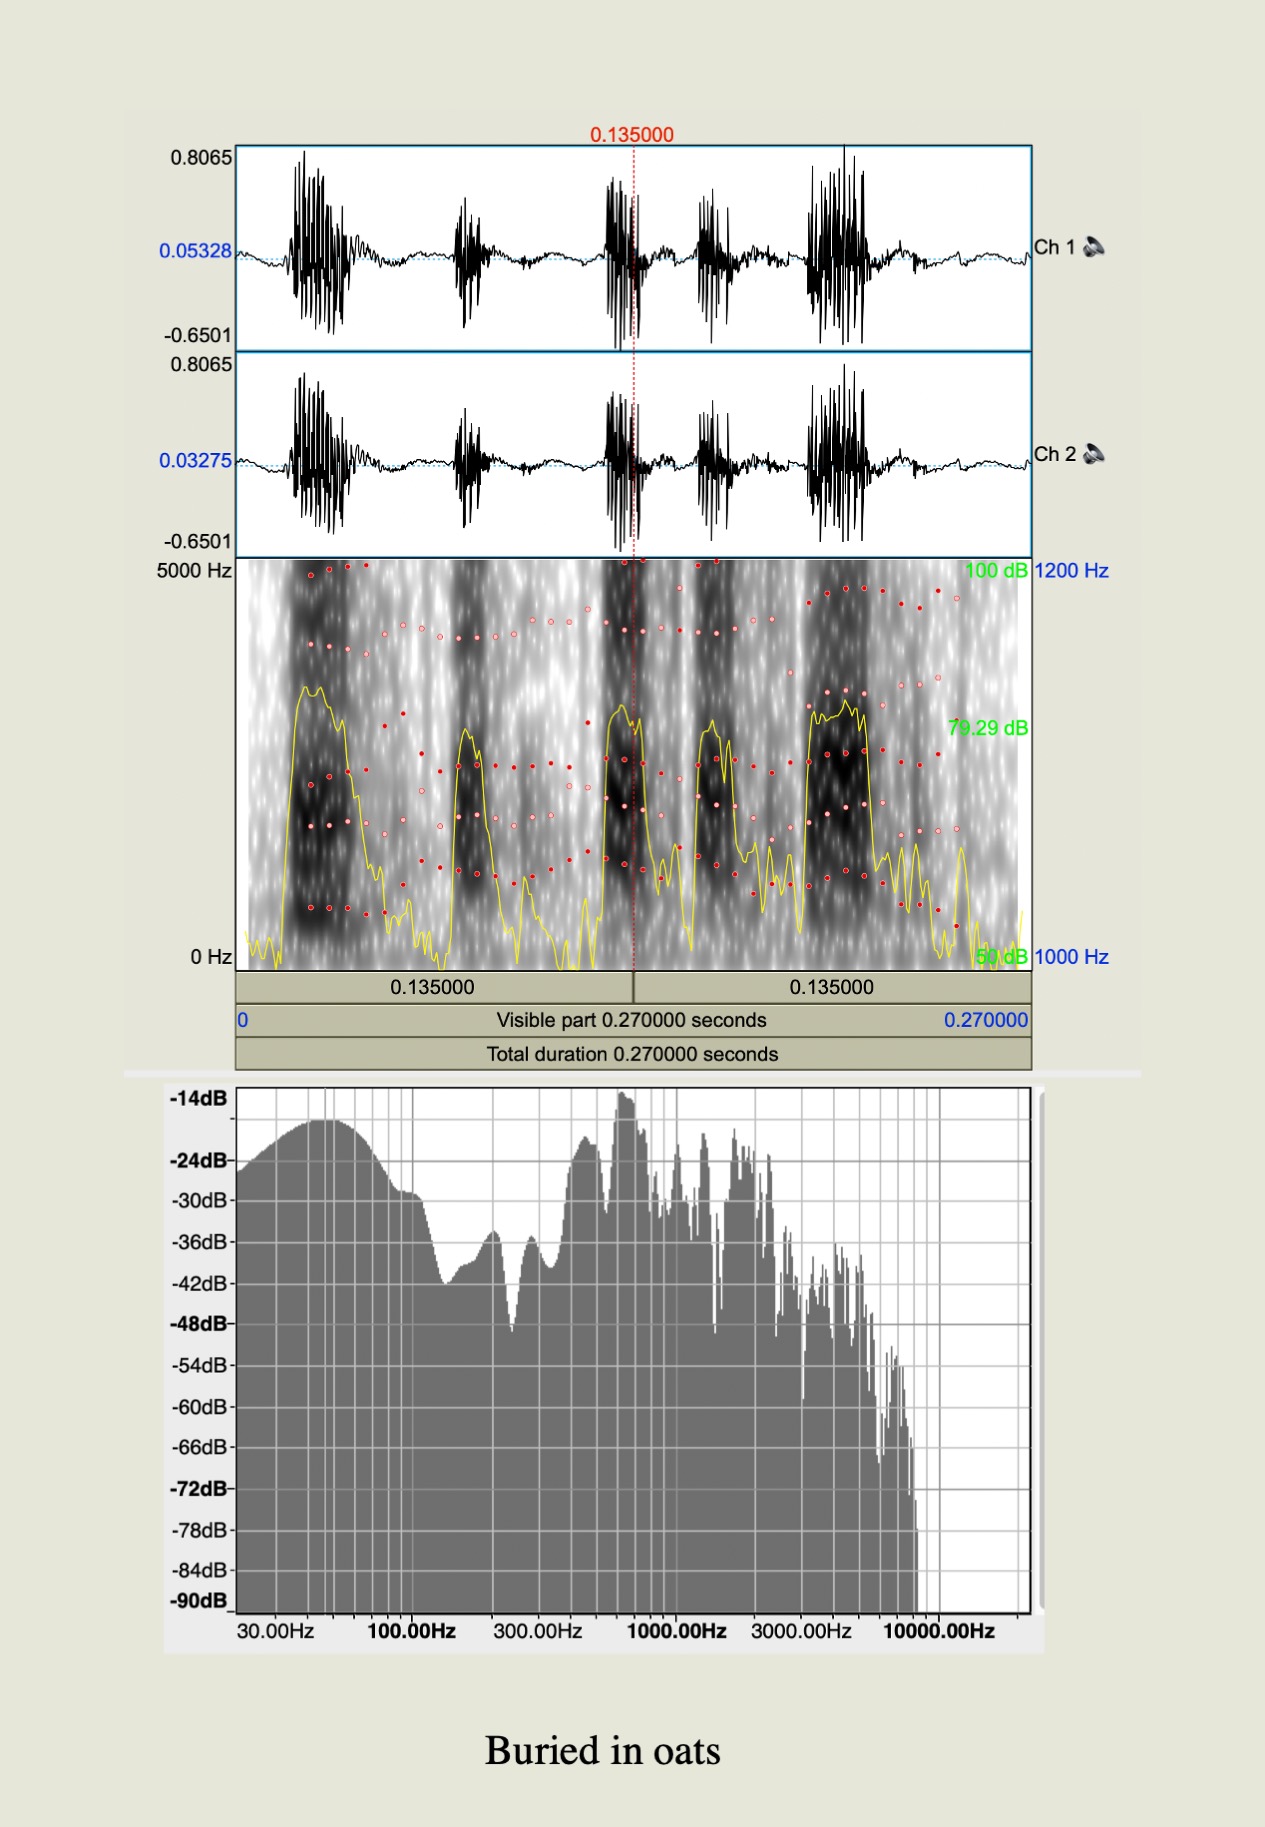

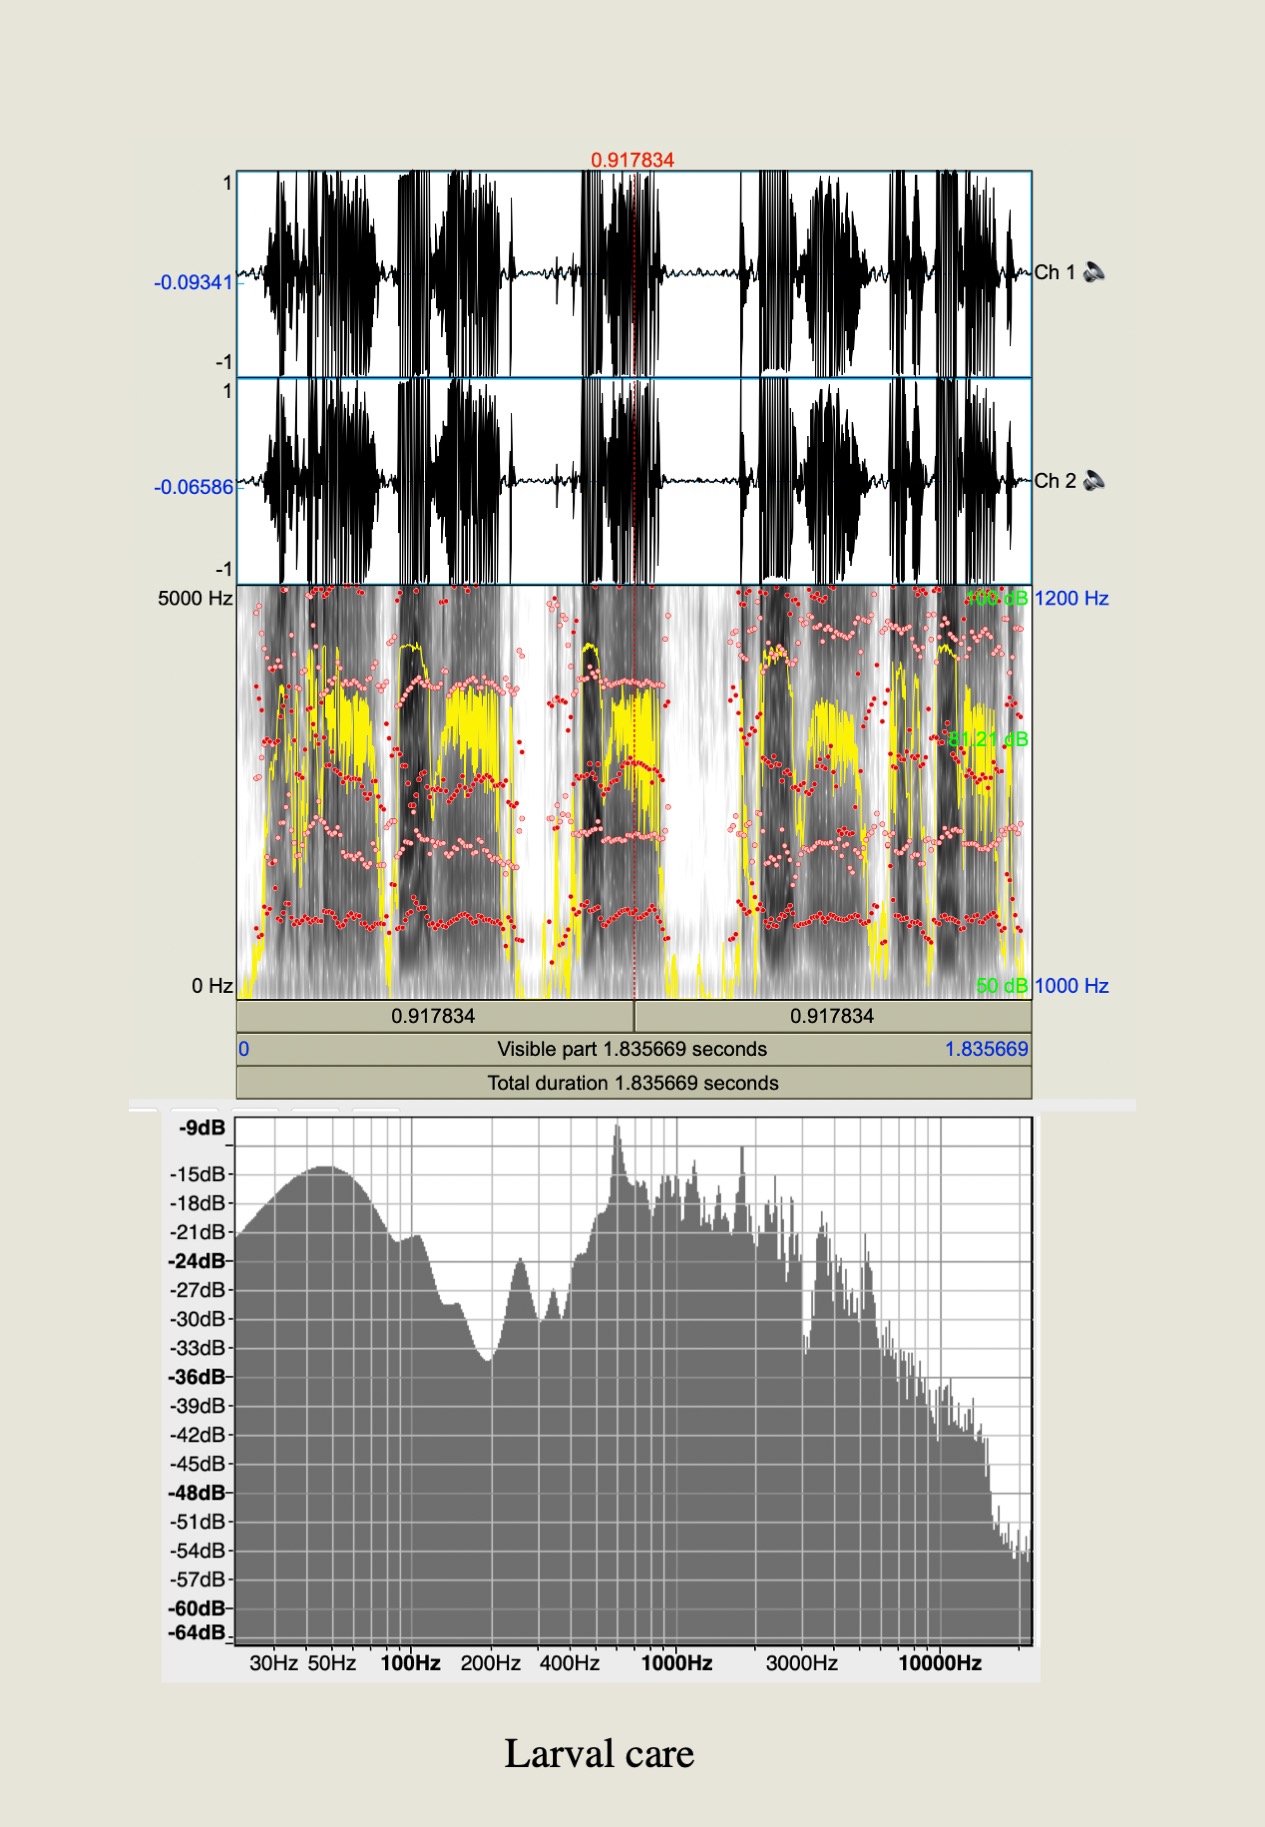

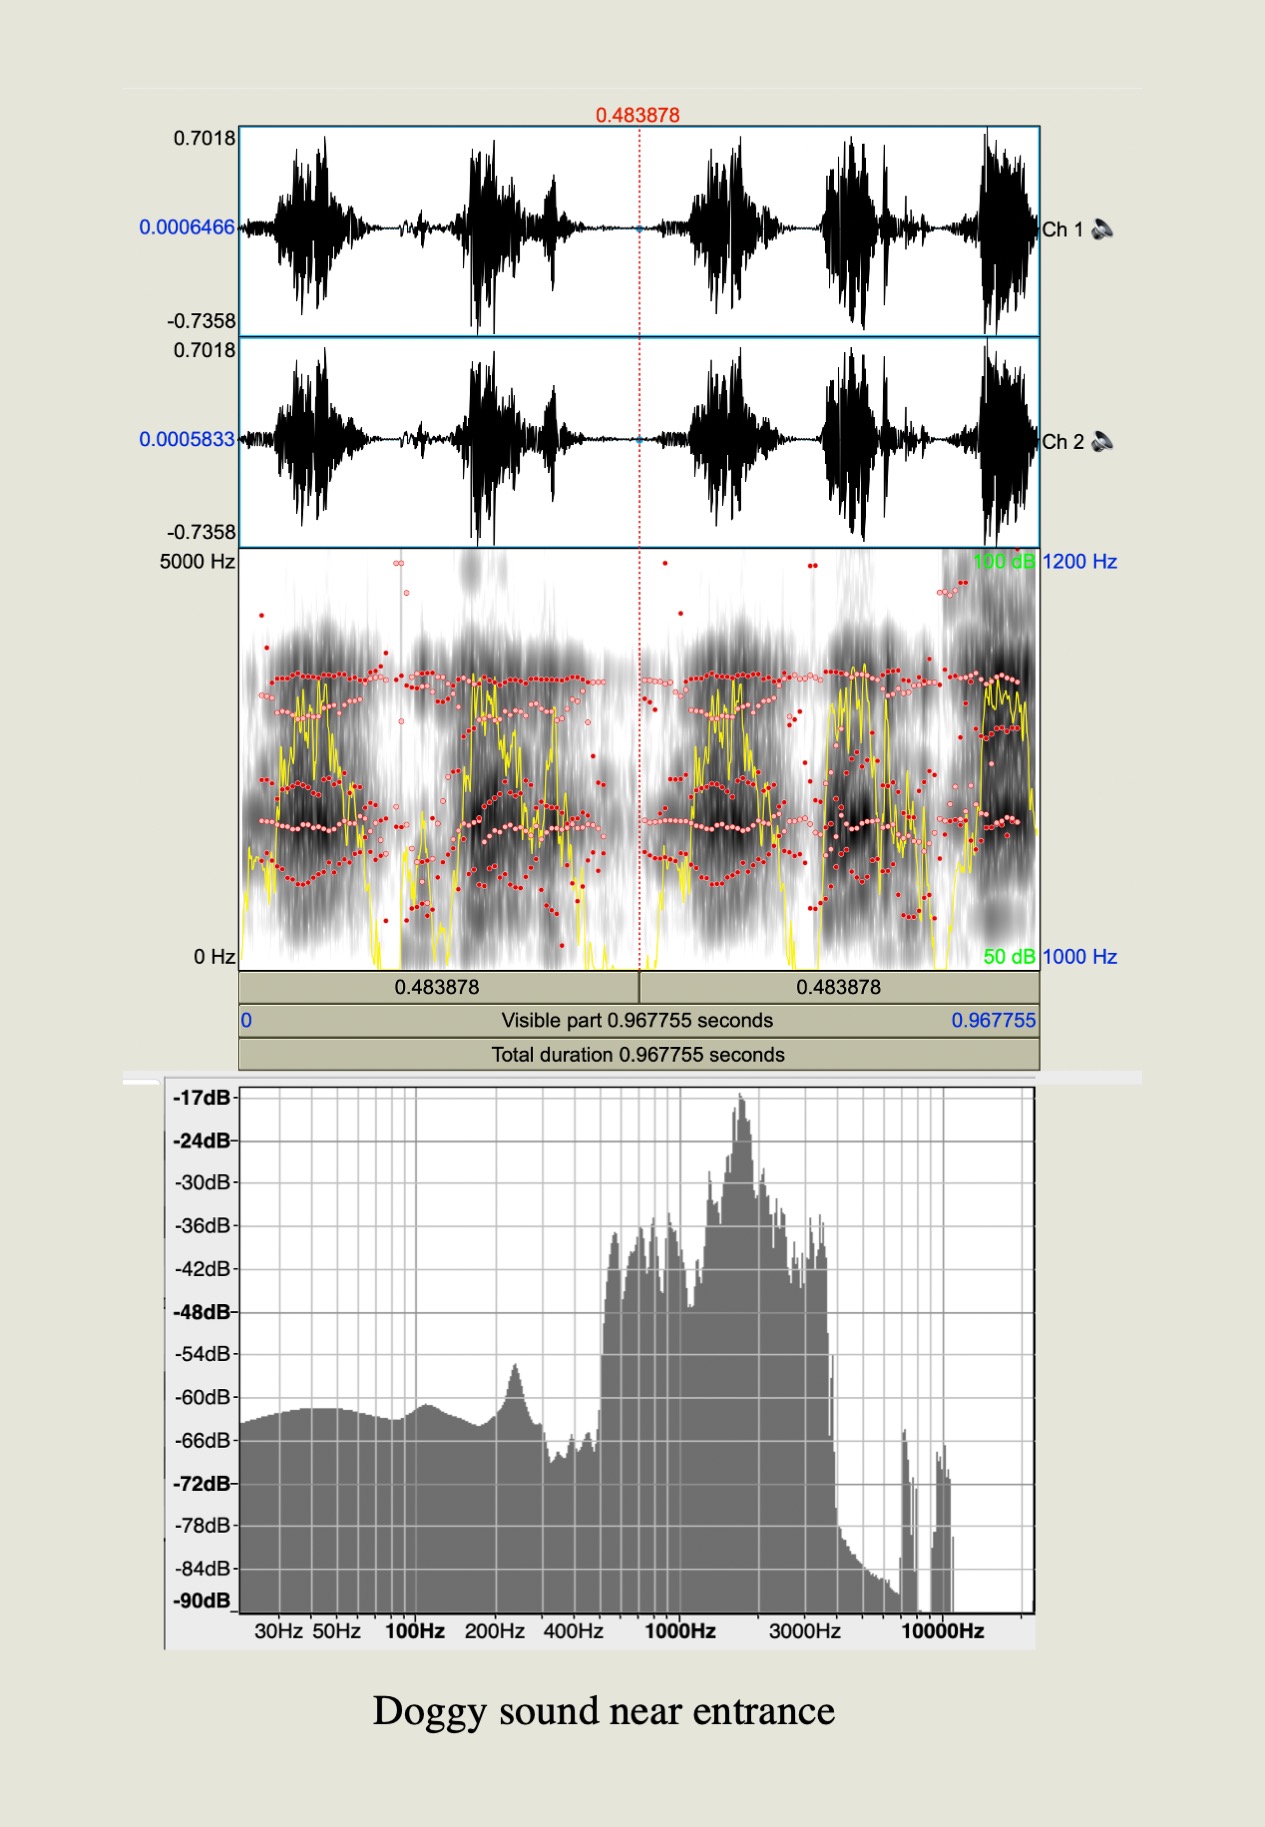

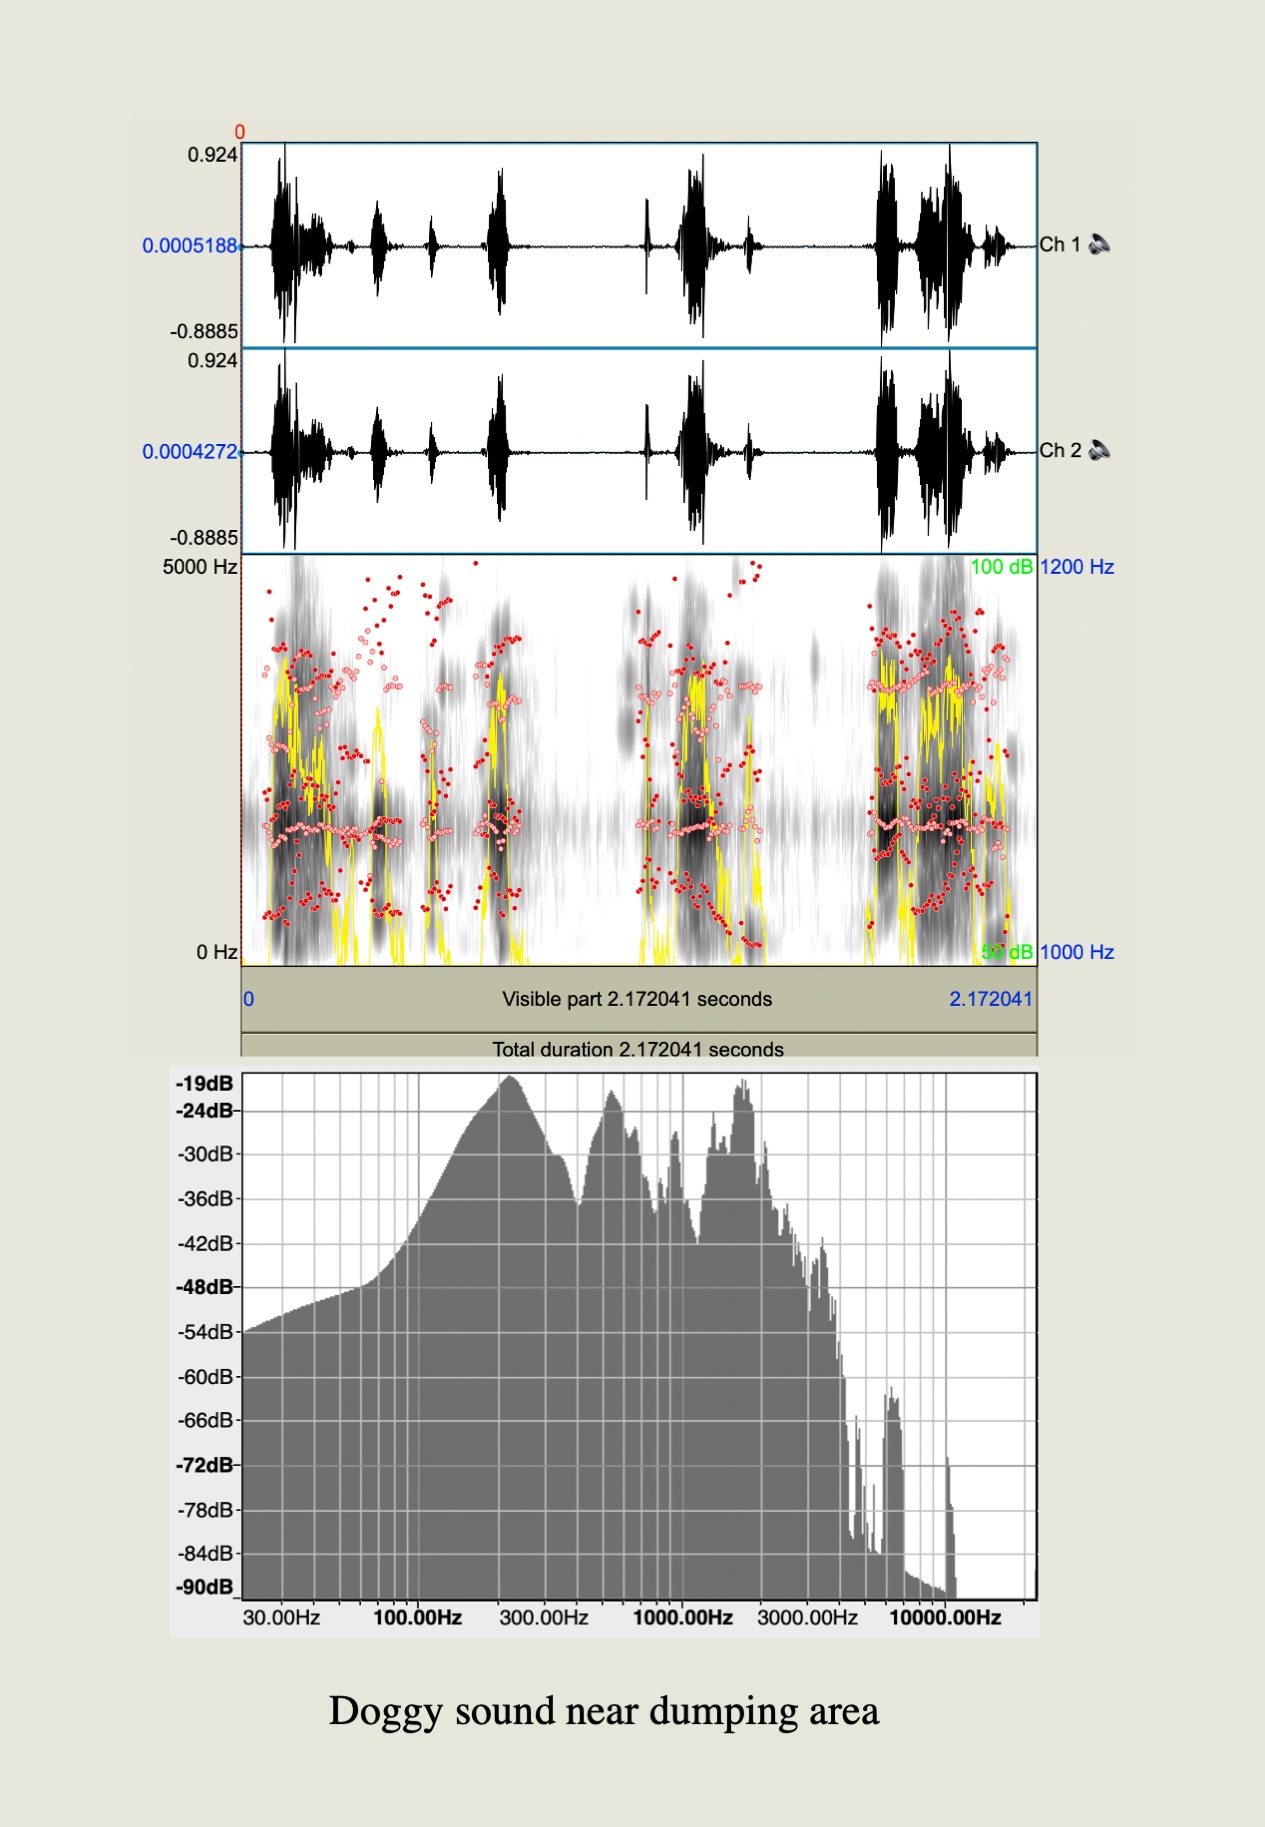


b

c

d

e

f

g

h

i

j

k

**Extended Data 4. Characteristics of acoustic signals in *Atta colombica*.** In each panel upper column: wave form, middle: spectrogram, bottom: spectrum plot. (a) pinching with forceps, and (b) burying with oats; whereas the recorded signals from independent conditions and locations were: (c) cutting Leguminosae leaves, (d) cutting Clusiaceae leaves, (e) cutting Heliconiaceae flowers, (f) vigilant sound near a fungus garden, (g) bark-like sound near a garbage dump, (h) bark-like sound near an entrance, (i) alarm sound on a trail, (j) larval care, and (k) a queen’s alarm sounds
