# Supplementary material for: Evolution of acoustic communication in fungus-growing ant societies
Source: Research Square preprint supplement (doi:10.21203/rs.3.rs-948296/v2), 2021-10-08
Supplement: Supplementary file 2 [file 6267c320a13af2c84a82319b.docx]

**Extended Data 6. Sound and pheromone inhibition experiments.** Ten sub-colonies, each with eight workers, were placed for 1 week near small pieces of fungus gardens, along with glued pheromone-producing organs, sound-producing organs, or upper part of the mesothorax (as a control) were placed with small pieces of fungus gardens for 1 week and post-experimental garden weights measured.
