# Supplementary material for: Evolution of acoustic communication in fungus-growing ant societies
Source: Research Square preprint supplement (doi:10.21203/rs.3.rs-948296/v2), 2021-10-08
Supplement: Supplementary file 3 [file 6dccd64dc3a58e8cae28171d.docx]

**Extended Data 1. Sampling information of the fungus-growing ants in Panama.** We collected all species of attines in Soberania National Park in Panama (9.12887, -79.71528 to 9.1879, -79.76921). Sampling were conducted on 3 Sep 2012 to 21 Nov 2012, 20 Aug 2013 to 8 Sep 2013, and 20 Feb 2015 to 28 Feb 2015. Samples were kept in Institution of Decision Science, Kyushu University.
