# Supplementary material for: Evolution of acoustic communication in fungus-growing ant societies
Source: Research Square preprint supplement (doi:10.21203/rs.3.rs-948296/v2), 2021-10-08
Supplement: Supplementary file 4 [file 908443ad1e46e03181845dfb.docx]

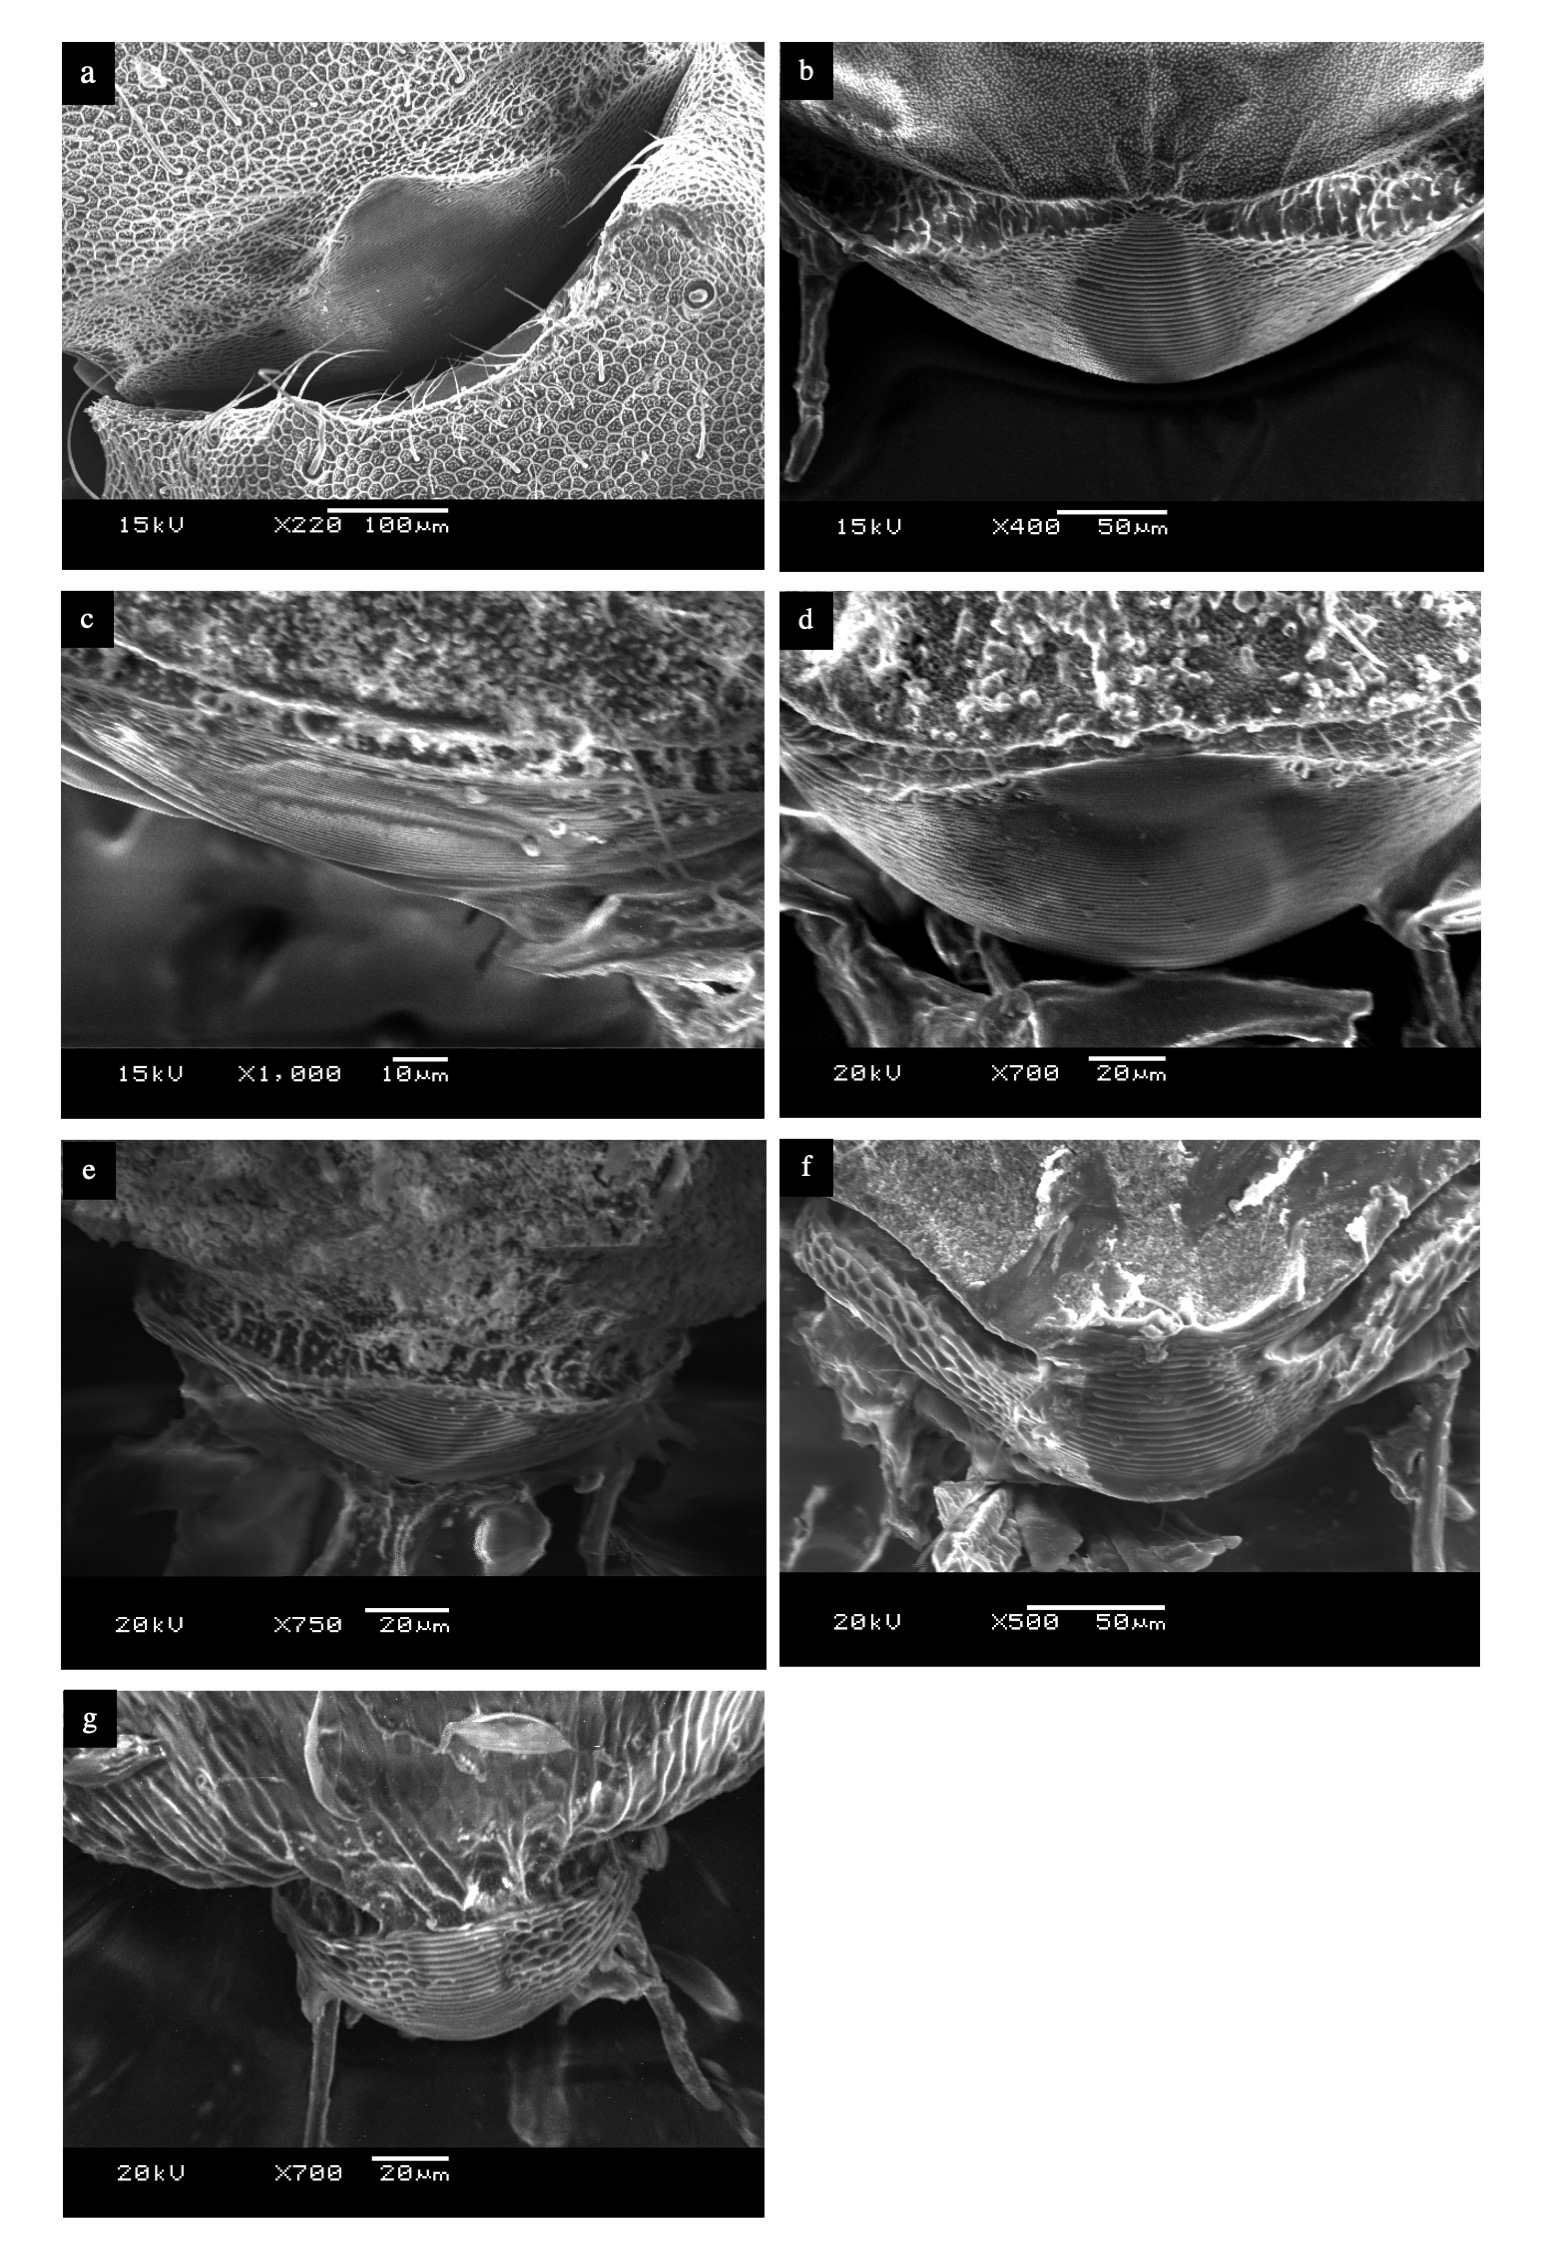


**Extended Data 5. SEM images of the stridulatory organs of seven attine ants.** a: *Atta colombica*, b: *Acromyrmex octospinosus*, c: *Sericomyrmex amabilis*, d: *Trachymyrmex zeteki*, e: *Cyphomyrmex costatus*, f: *Apterostigma mayri*, g: *Myrmicocrypta ednaella*
