# Supplementary material for: Evolution of acoustic communication in fungus-growing ant societies
Source: Research Square preprint supplement (doi:10.21203/rs.3.rs-948296/v2), 2021-10-08
Supplement: Supplementary file 6 [file 9bd39b40de2e93e031b1f860.docx]

**Extended Data 2. Acoustic data of eight species of attines.**
